# Supplementary material for: Noble-metal high-entropy-alloy tuning the products of electrocatalytic 5-hydroxymethylfurfural oxidation
Source: Royal Society of Chemistry journal article supplement (doi:10.1039/d3se00756a), 2023-01-01
Supplement: d3se00756a1.pdf [file d3se00756a1.pdf]

## Supporting Information

### **Noble-metal high-entropy-alloy tuning the products of electrocatalytic 5-hydroxymethylfurfural oxidation**

Xianfeng Huang,<sup>1,3, ‡</sup> Bo Zhang,<sup>2, ‡</sup> Cong Guo,<sup>2</sup> Guangxing Yang,<sup>2,\*</sup> Qiao Zhang,<sup>2</sup> Shuang Li,<sup>1,\*</sup> Hao Yu,<sup>3,\*</sup> and Feng Peng<sup>2</sup>

<sup>1</sup>*School of Biology and Biological Engineering, South China University of Technology, Guangzhou, Guangdong 510006, China*

<sup>2</sup>*School of Chemistry and Chemical Engineering, Guangzhou University, Guangzhou, Guangdong 510006, China;*

<sup>3</sup>*School of Chemistry and Chemical Engineering, South China University of Technology, Guangzhou, Guangdong 510641, China*

*‡These authors contributed equally.*

*\*Corresponding Authors: [E-mails: [yanggx@gzhu.edu.cn](mailto:yanggx@gzhu.edu.cn) (G. Yang); [shuangli@scut.edu.cn](mailto:shuangli@scut.edu.cn) (S. Li); [yuhao@scut.edu.cn](mailto:yuhao@scut.edu.cn) (H. Yu)]*

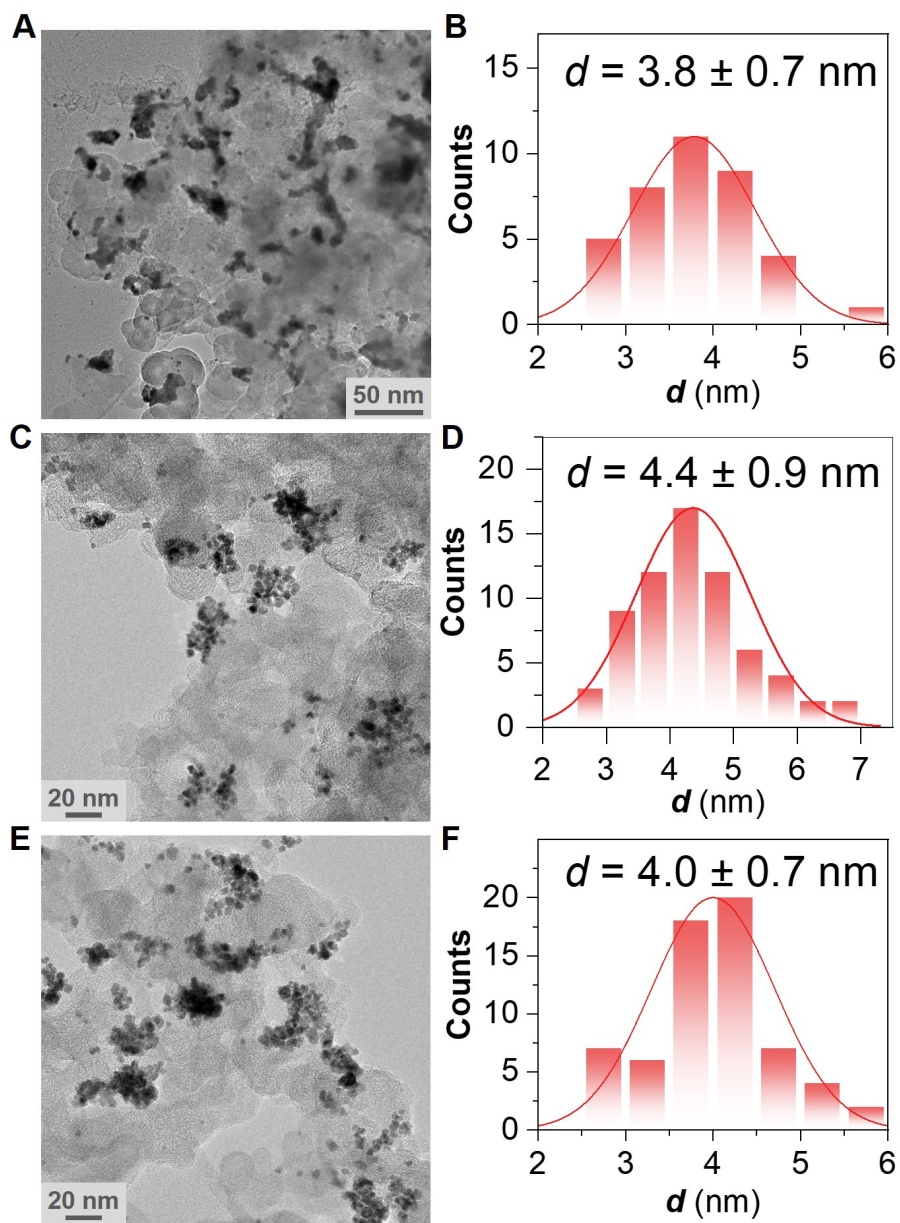

**Figure S1.** TEM images and corresponding histogram of size distribution for (A and B) PtRhPdIr, (C and D) PtRhPdIrRu and (E and F) PtRhPdIrAu NPs.

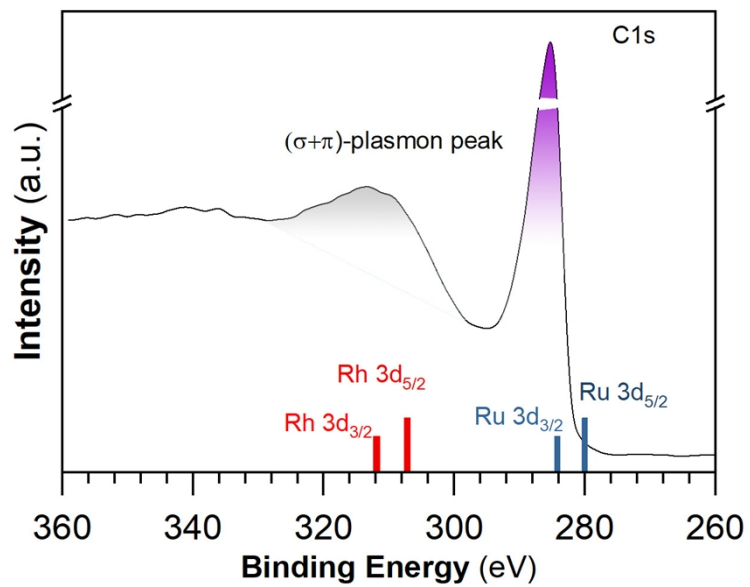

**Figure S2** XPS spectrum from 260 to 360 eV for PtRhPdIrRuAu HEA NPs.

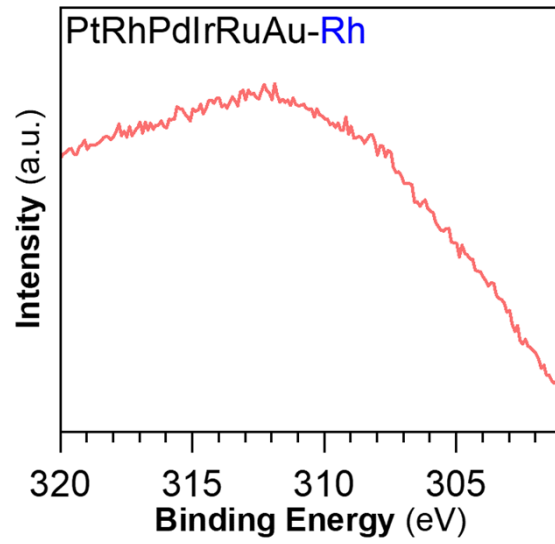

**Figure S3** XPS spectrum from 301 to 320 eV (Rh 3d) for PtRhPdIrRuAu HEA NPs.

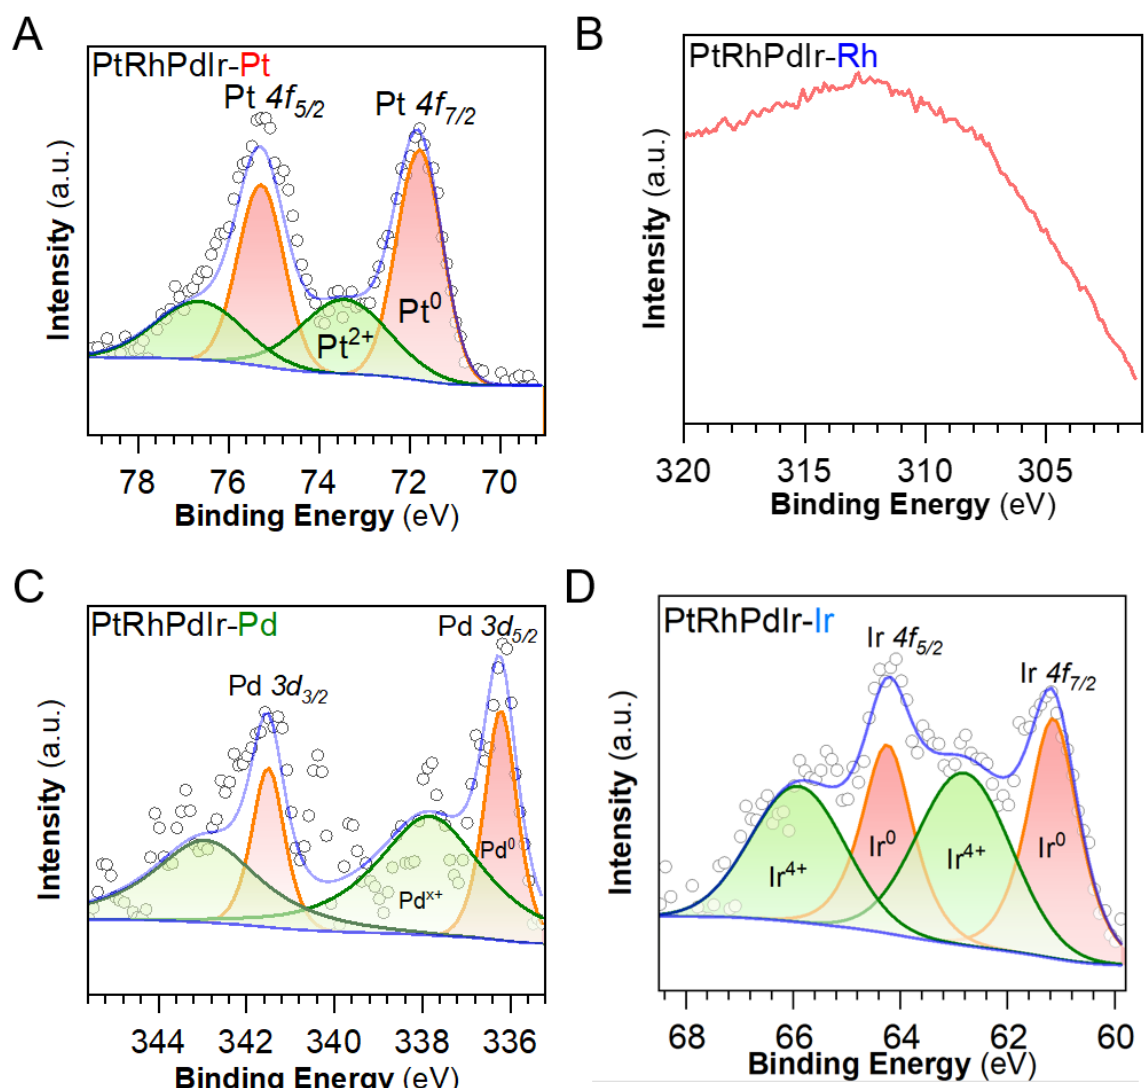

**Figure S4** XPS spectra of (A) Pt 4f, (B)Rh 3d, (C)Pd 3d, and (D) Ir 4f for PtRhPdIr HEA NPs.

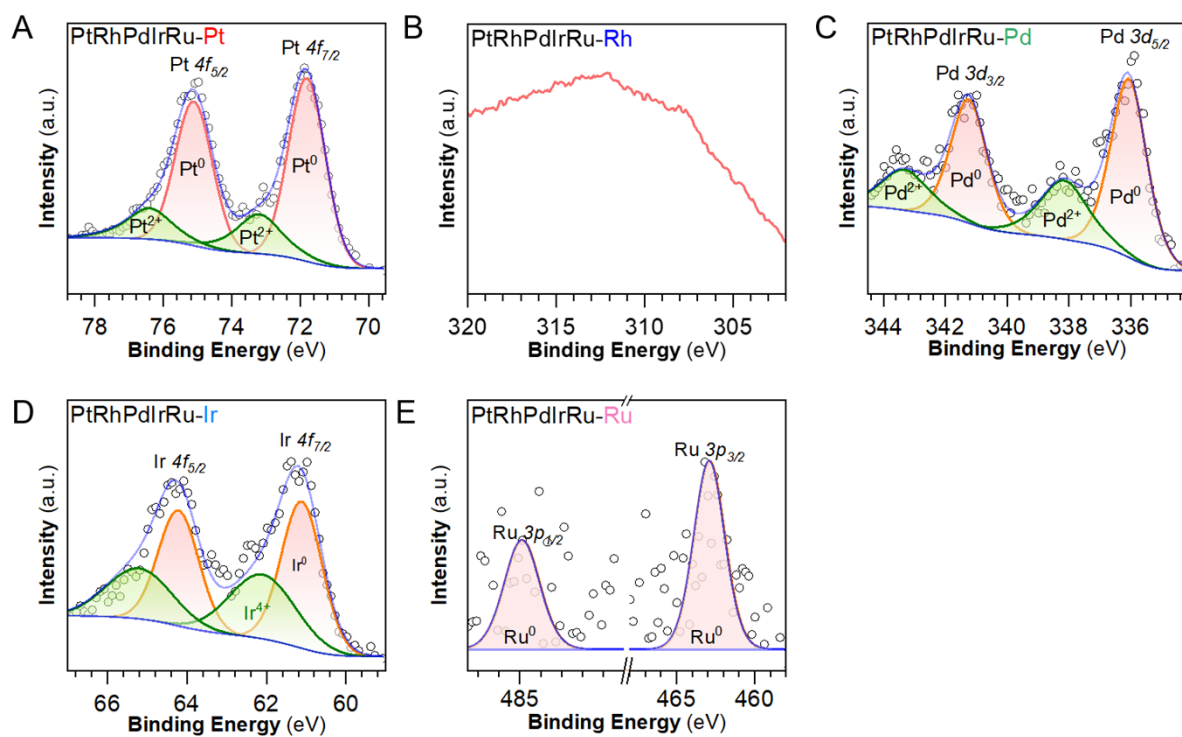

**Figure S5.** XPS spectra of (A) Pt 4f, (B) Rh 3d, (C) Pd 3d, (D) Ir 4f, and (E) Ru 3p for PtRhPdIrRu HEA NPs.

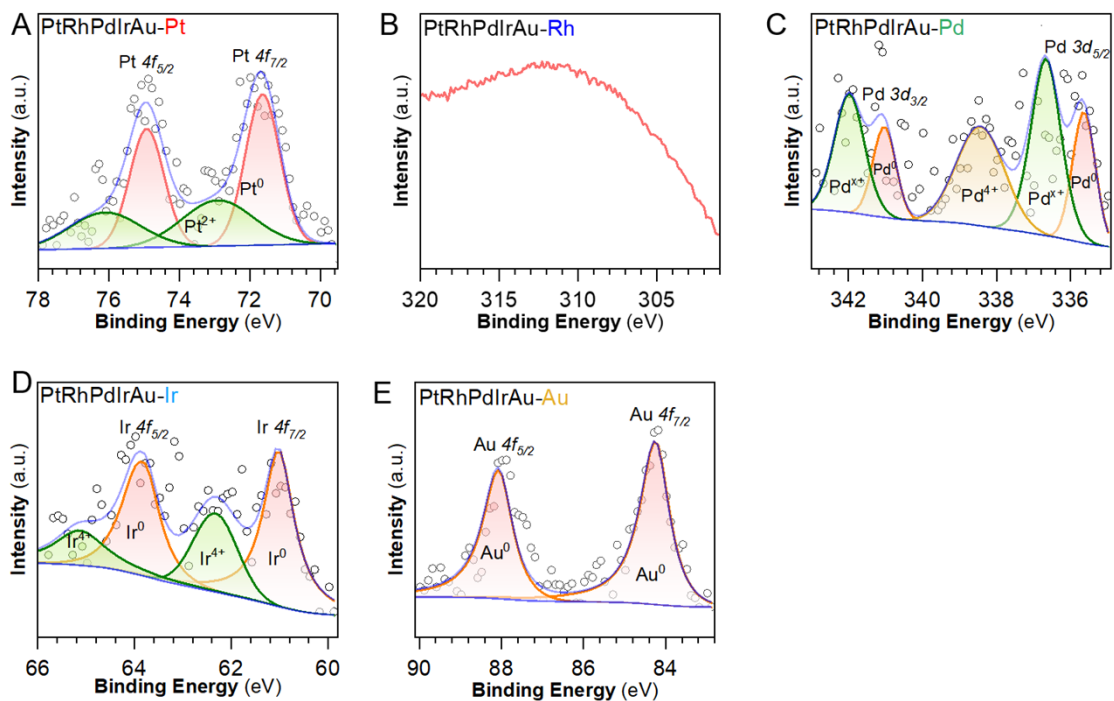

**Figure S6.** XPS spectra of (A) Pt 4f, (B) Rh 3d, (C) Pd 3d, (D) Ir 4f, and (E) Au 4f for PtRhPdIrAu HEA NPs.

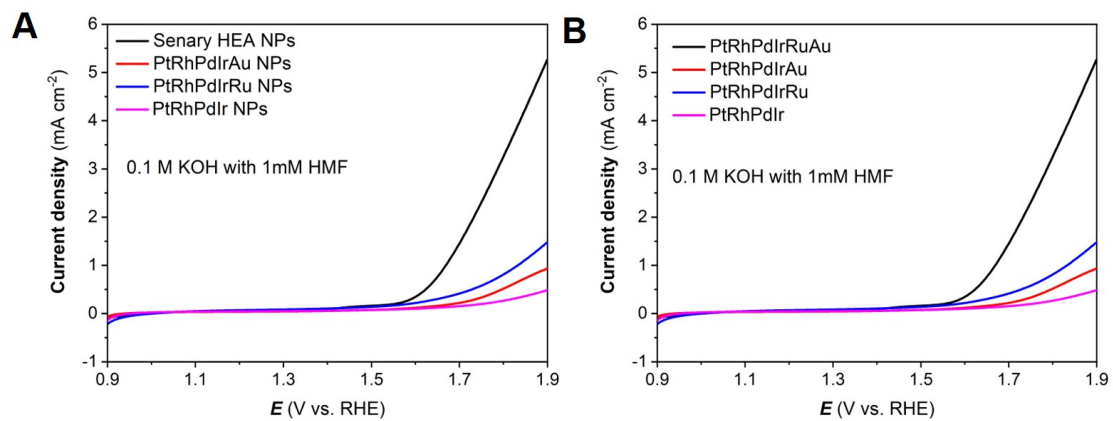

**Figure S7.** Comparison of LSV curves of HEA NPs in 0.1 M KOH without/with 1 mM HMF at a scan rate of 10 mV s<sup>-1</sup>.



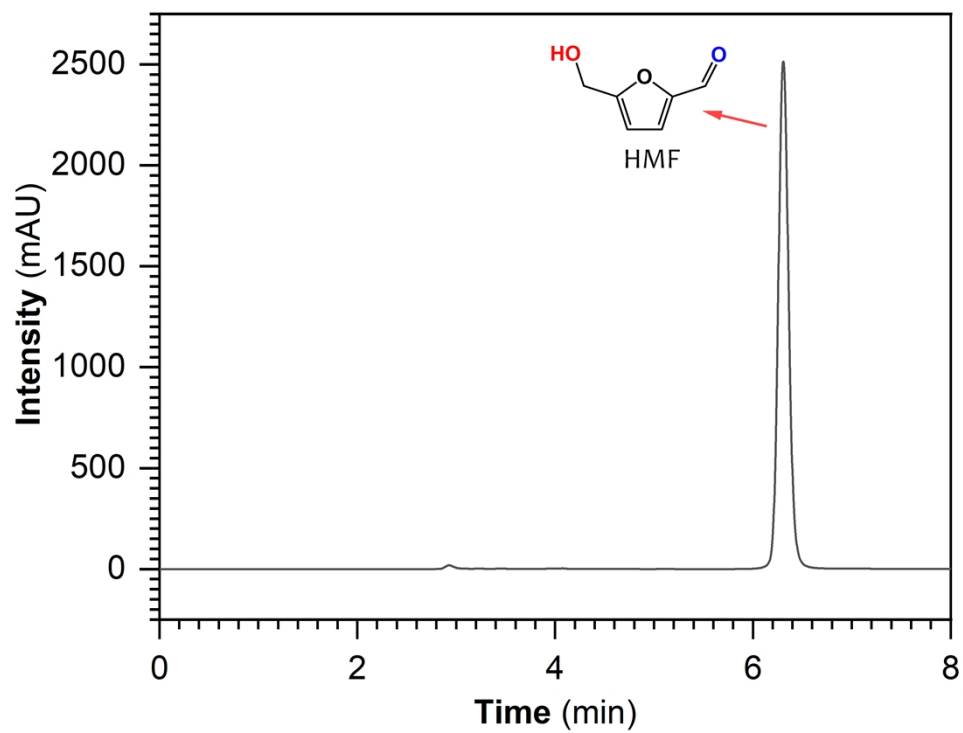

**Figure S8.** HPLC chromatogram of 0.1 M KOH + 1 mM HMF.

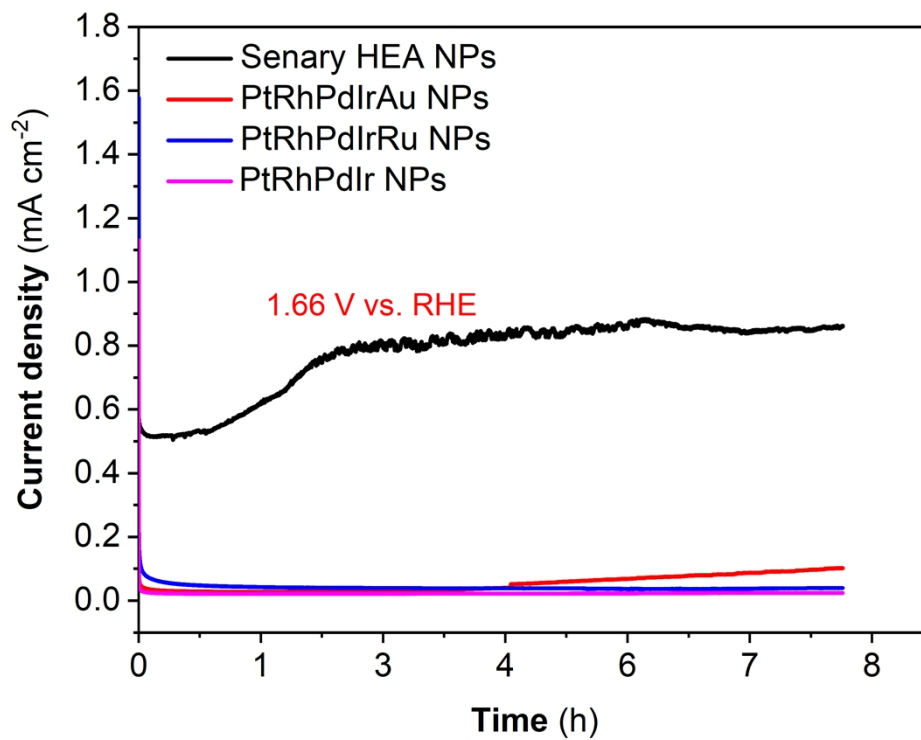

**Figure S9.** Chronoamperometric curves of HEA NPs in 0.1 M KOH + 1 mM HMF at 1.66 V vs. RHE.

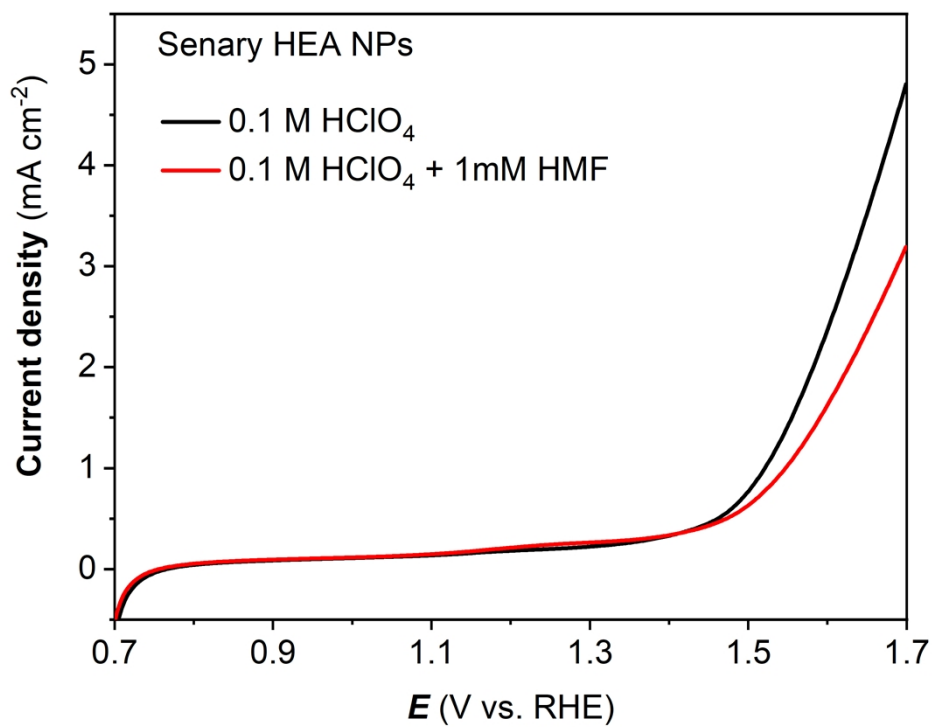

**Figure S10.** Comparison of LSV curves of Senary HEA NPs in 0.1 M HClO<sub>4</sub> without/with 1 mM HMF at a scan rate of 10 mV s<sup>-1</sup>.

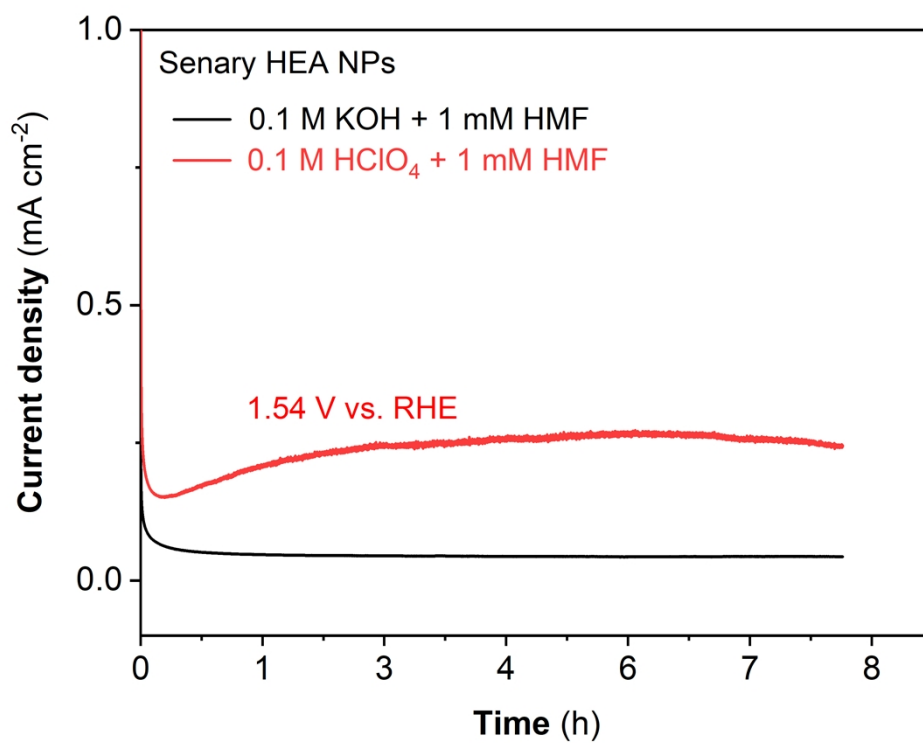

**Figure S11.** Chronoamperometric curves of Senary HEA NPs in alkaline/acidic electrolytes at 1.54 V vs. RHE.

**Table S1.** Selectivity of HMF oxidation products over HEA NPs in alkaline/acidic electrolytes with 1 mM HMF at different potential for 8 h.

| Catalyst     | E(V vs RHE) | Electrolyte            | Conversion (%) | Selectivity (%) |        |      |      |
|--------------|-------------|------------------------|----------------|-----------------|--------|------|------|
|              |             |                        |                | FDCA            | HMFCFA | FFCA | DFC  |
| PtRhPdIr     | 1.66        | 0.1 M KOH              | 8.12           | 0               | 39.3   | 16.0 | 44.6 |
| PtRhPdIrAu   | 1.66        | 0.1 M KOH              | 9.68           | 20.9            | 4.2    | 25.9 | 48.8 |
| PtRhPdIrRu   | 1.66        | 0.1 M KOH              | 17.04          | 24.2            | 7.5    | 27.7 | 40.4 |
| PtRhPdIrRuAu | 1.66        | 0.1 M KOH              | 48.41          | 18.0            | 63.4   | 0.5  | 17.9 |
| PtRhPdIrRuAu | 1.54        | 0.1 M KOH              | 21.61          | 11.5            | 16.3   | 29.4 | 42.5 |
| PtRhPdIrRuAu | 1.54        | 0.1M HClO <sub>4</sub> | 34.92          | 0               | 8.4    | 17.2 | 74.2 |

**Table S2.** The selectivity in different products on reported noble metal based catalysts for the electrochemical oxidation of HMF.

| Catalysts                              | Electrolyte/HMF concentration       | Reaction time [h] | $E$ (V vs RHE) | selectivity [%] |        |      | Ref |
|----------------------------------------|-------------------------------------|-------------------|----------------|-----------------|--------|------|-----|
|                                        |                                     |                   |                | DFE             | HMFCFA | FDCA |     |
| Pd/C                                   | 0.02 M                              | 1                 | 0.6            | <1              | 25     | 11   | 1   |
| Pd <sub>2</sub> Au <sub>1</sub> /C     | 0.02M                               | 1                 | 0.6            | <1              | 30     | 8    |     |
| Pd <sub>1</sub> Au <sub>2</sub> /C     | 0.02M                               | 1                 | 0.6            | —               | 59     | 25   |     |
| Au/C                                   | 0.02M                               | 1                 | 0.6            | —               | 98     | 1    |     |
| Pd/C                                   | 0.02M                               | 1                 | 0.9            | —               | 70     | 29   |     |
| Pd <sub>2</sub> Au <sub>1</sub> /C     | 0.02M                               | 1                 | 0.9            | —               | 35     | 64   |     |
| Pd <sub>1</sub> Au <sub>2</sub> /C     | 0.02M                               | 1                 | 0.9            | —               | 16     | 83   |     |
| Au/C                                   | 0.02M                               | 1                 | 0.9            | —               | 98     | 1    |     |
| Pd/C                                   | 0.02M                               | 1                 | 1.2            | —               | 71     | 3    |     |
| Pd <sub>2</sub> Au <sub>1</sub> /C     | 0.02M                               | 1                 | 1.2            | —               | 61     | 22   |     |
| Pd <sub>1</sub> Au <sub>2</sub> /C     | 0.02M                               | 1                 | 1.2            | —               | 60     | 36   |     |
| Au/C                                   | 0.02M                               | 1                 | 1.2            | —               | 81     | 14   |     |
| Pd <sub>14</sub>                       | 0.005M                              | 2                 | 0.82           | —               | —      | 12   | 2   |
| Au <sub>14</sub>                       | 0.005M                              | 2                 | 0.82           | —               | —      | 7.7  |     |
| Au <sub>7</sub> /Pd <sub>7</sub>       | 0.005M                              | 2                 | 0.82           | —               | —      | 20.6 |     |
| Pd <sub>7</sub> /Au <sub>7</sub>       | 0.005M                              | 2                 | 0.82           | —               | —      | 23.8 |     |
| (AuPd) <sub>7</sub>                    | 0.005M                              | 2                 | 0.82           | —               | —      | 22.5 |     |
| Ru <sub>1</sub> /NiO                   | 1.0M KOH                            | 10C               | 1.3            | 9               | 73     | 1    | 3   |
| Ru <sub>1</sub> /NiO                   | 1.0M KOH                            | 10C               | 1.5            | 14              | 40     | 29   |     |
| Ru <sub>1</sub> /NiO                   | 1.0M KOH                            | 10C               | 1.7            | 10              | 41     | 30   |     |
| Pt                                     | 0.02M                               | 25C               | 2              | 10.5            | 0      | 0    | 4   |
| Pt                                     | 0.02M                               | 50C               | 2              | 24.8            | 0      | 0    |     |
| Pt                                     | 0.02M                               | 100C              | 2              | 14.8            | 0      | 0    |     |
| Pt                                     | 0.02M                               | 150C              | 2              | 16.3            | 0      | 0    |     |
| Pt                                     | 0.02M                               | 200C              | 2              | 9.6             | 0      | 0    |     |
| Pt                                     | 0.02M                               | 250C              | 2              | 5.3             | 0      | <1   |     |
| Pt/C                                   | 0.1M                                | 17h               | —              | 72              | 2      | 2    | 5   |
| PtRu(1:1)/C                            | 0.1M                                | 17h               | —              | 89              | 0      | 0    |     |
| Ru/C                                   | 0.1M                                | 17h               | —              | 32              | 20     | 14   |     |
| Pt/Fe <sub>3</sub> O <sub>4</sub> /rGO | 0.1M KOH                            | 20h               | 0.85           | —               | 35.8   | —    | 6   |
| Pt/Fe <sub>3</sub> O <sub>4</sub> /rGO | 0.1M K <sub>2</sub> SO <sub>4</sub> | 20h               | 0.85           | 94.4            | —      | —    |     |

## References

1. Chadderdon, D. J.; Xin, L.; Qi, J.; Qiu, Y.; Krishna, P.; More, K. L.; Li, W. *Green Chemistry*, 2014, **16**, 3778-3786.
2. Park, M.; Gu, M.; Kim, B.-S. *ACS Nano*, 2020, **14**, 6812-6822.
3. Ge, R.; Wang, Y.; Li, Z.; Xu, M.; Xu, S.-M.; Zhou, H.; Ji, K.; Chen, F.; Zhou, J.; Duan, H. *Angewandte Chemie International Edition*, 2022, **61**, e202200211.
4. Kubota, S. R.; Choi, K.-S. *Chemsuschem*, 2018, **11**, 2138-2145.
5. Cao, T.; Wu, M.; Ordonsky, V. V.; Xin, X.; Wang, H.; Métivier, P.; Pera-Titus, M. *Chemsuschem*, 2017, **10**, 4851-4854.
6. Zhou, C.; Shi, W.; Wan, X.; Meng, Y.; Yao, Y.; Guo, Z.; Dai, Y.; Wang, C.; Yang, Y. *Catalysis Today*, 2019, **330**, 92-100.
